# Supplementary material for: Retrospective Natural History Study of RPGR-Related Cone- and Cone-Rod Dystrophies While Expanding the Mutation Spectrum of the Disease
Source: MDPI journal article supplement (doi:10.3390/ijms23137189), 2022-06-28
Supplement: s1 [file s1]

# ***RPGR*-related Cone- and Cone-Rod Dystrophies: retrospective natural history study and genotype-phenotype correlation.**

Marco Nassisi, Giuseppe De Bartolo, Saddek Mohand-Said, Christel Condroyer, Aline Antonio, Marie-Elise Lancelot, Kinga Bujakowska, Vasily Smirnov, Thomas Pugliese, John Neidhardt, José-Alain Sahel, Christina Zeitz\*, Isabelle Audo\*.

\* These authors contributed equally

## **Supplementary material**

**Figure S1.** Pedigree of the families for whom segregation analysis was available.

**Figure S2.** Patients excluded from quantitative SW-FAF analysis

**Table S1.** *In silico* analysis *RPGR*<sup>ORF15</sup> novel missense variant.

**Table S2.** *RPGR*<sup>ORF15</sup> conservation analysis for the novel missense variant.

**Table S3.** Clinical data of the cohort.

**Table S4.** List of primers used for *RPGR*<sup>ORF15</sup> exon 15 Sanger sequencing.

**Table S5.** Agreement between eyes.

**Figure S1.** Pedigree of the families for whom segregation analysis was available. The black arrowheads indicate the proband.

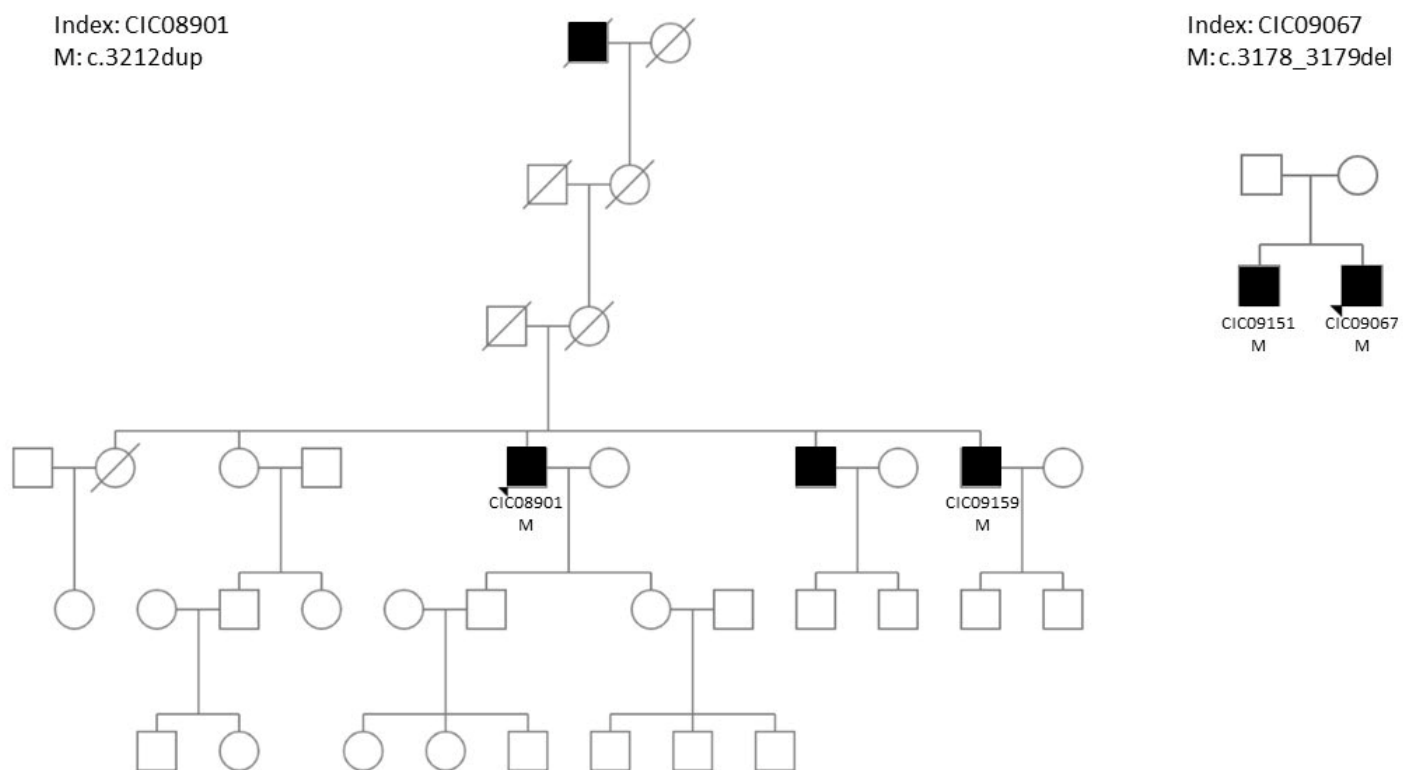

**Figure S2.** Patients excluded from quantitative SW-FAF analysis as the hyperautofluorescent ring encircling the dystrophic retina either included the optic nerve head or disappeared during the follow-up.

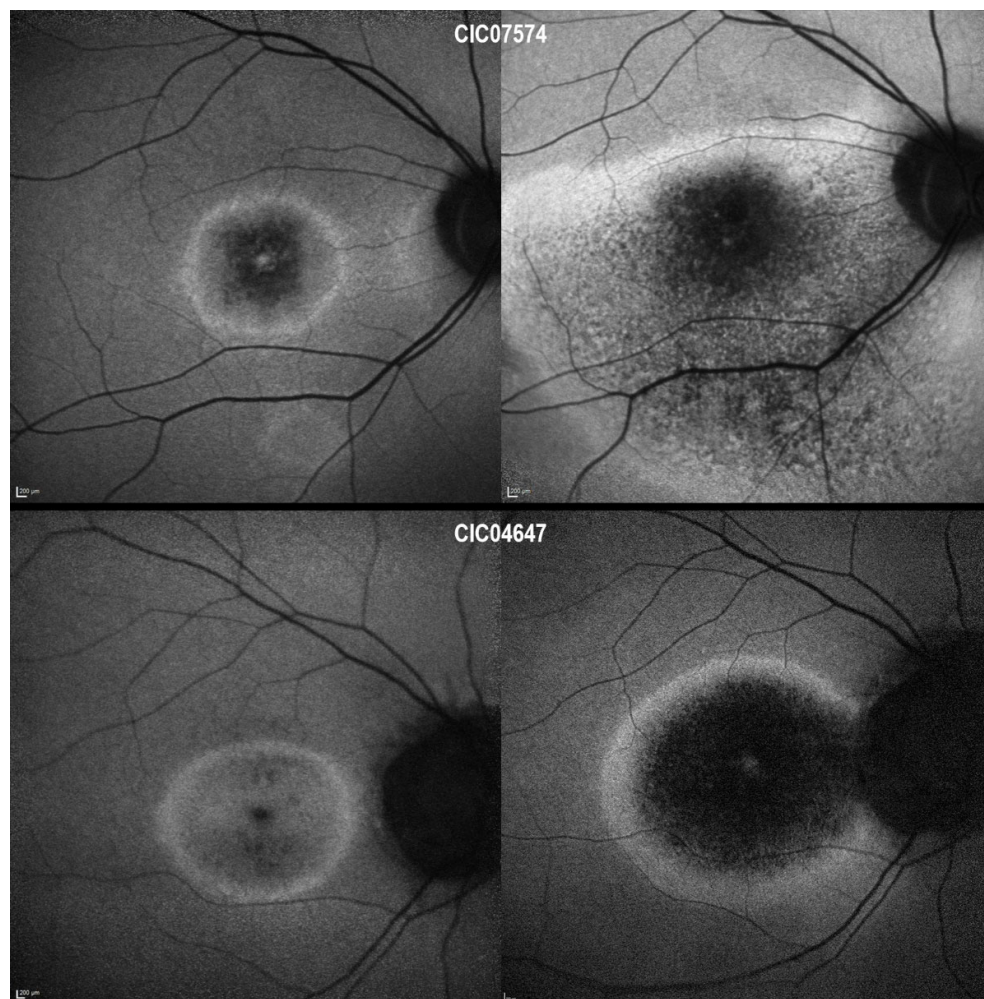

**Table S1.** *In silico* analysis performed on the *RPGR*<sup>ORF15</sup> missense variant included in the study. PhyloP range: -14.1;6.4. Grantham score range: 0;215.

| Genomic<br>start<br>position<br>(hg19) | cDNA<br>(NM_00103485<br>3.1) | Protein<br>change | rs#; gnomAD:<br>frequency<br>(allele count/total<br>alleles/number of<br>homozygous) | PhyloP | Grantham | Pathogenic prediction for<br>missense changes |                               |                                 | Effect on splicing prediction |          |     |
|----------------------------------------|------------------------------|-------------------|--------------------------------------------------------------------------------------|--------|----------|-----------------------------------------------|-------------------------------|---------------------------------|-------------------------------|----------|-----|
|                                        |                              |                   |                                                                                      |        |          | SIFT<br>(score)                               | Mutatio<br>nTaster<br>(prob)  | PolyPhen<br>2 (score)           | MaxEnt                        | NNSplice | SSF |
| 38145574                               | c.2678G>T                    | p.(Gly893<br>Val) | no rs#; gnomAD: absent                                                               | -0,28  | 109      | Tolerate<br>d (0.24)                          | disease<br>causing<br>(0.682) | possibly<br>damaging<br>(0.743) | -                             | -        | -   |

**Table S2.** Conservation analysis of the novel missense variant c.2678G>T p.(Gly893Val) on *RPGR*<sup>ORF15</sup>, described in the study. This analysis was performed using the University of California Santa Cruz (UCSC) Genome Browser, available at <https://genome.ucsc.edu/index.html>. The interested residue is highlighted in red.

| Nucleotide Genomic position (hg38 – NM_001034853.1) | 38145574             | Nucleotide genomic position (hg19) | 48835341             | Nucleotide genomic position (hg19) | 48835341    |
|-----------------------------------------------------|----------------------|------------------------------------|----------------------|------------------------------------|-------------|
| AA position                                         | 893                  | AA position                        | 893                  | AA position                        | 893         |
| Physiological residue                               | G                    | Physiological residue              | G                    | Physiological residue              | G           |
| Altered residue                                     | V                    | Altered residue                    | V                    | Altered residue                    | V           |
| Human                                               | EEEGE <b>G</b> EGEEE | Domestic goat                      | -----                | Budgerigar                         | EEE-EGV--KK |
| Chimp                                               | -----                | Horse                              | -----                | Parrot                             | EKG-DCK--GK |
| Gorilla                                             | -----                | White rhinoceros                   | NGE- <b>G</b> GER--  | Scarlet macaw                      | GKG-DCK--GK |
| Orangutan                                           | -----                | Cat                                | GEE- <b>E</b> GKEVE  | Rock pigeon                        | CEG-VFKEYAK |
| Gibbon                                              | -----                | Dog                                | GEE- <b>E</b> GKEVE  | Mallard duck                       | GEP--EMEDLQ |
| Rhesus                                              | KE-- <b>G</b> RRREEE | Ferret                             | -----                | Chicken                            | QEQ-RGKQGAK |
| Crab-eating Macaque                                 | -----                | Panda                              | EGE- <b>G</b> EREKEK | Turkey                             | RRQ-EEEEAE  |
| Baboon                                              | -----                | Pacific walrus                     | GEE- <b>E</b> GEGEAE | American alligator                 | D--EGEDDGE  |
| Green Monkey                                        | -----                | Weddell seal                       | EEG- <b>G</b> GEVEE  | Green seaturtle                    | REE-KCSMVG  |
| Marmoset                                            | -----                | Black flying-fox                   | --D-D <b>G</b> EEEE  | Painted turtle                     | EAE-EGEEDE  |
| Squirrel Monkey                                     | EEEGE <b>E</b> EEEEE | Megabat                            | -----                | Chinese softshell turtle           | EED-KSEEEEG |
| Bushbaby                                            | EG-----              | David's myotis (bat)               | -----                | Spiny softshell turtle             | EED-KSEEEEG |
| Chinese tree shrew                                  | EEEEEEEGEG           | Big brown bat                      | E--- <b>G</b> EEGEE  | Lizard                             | EKE-EKENEEG |
| Squirrel Monkey                                     | KEEKE <b>E</b> RGKGE | Hedgehog                           | GGE- <b>E</b> GGE    | X_tropicalis                       | EEE--EDEEEE |
| Egyptian jerboa                                     | EEEE <b>E</b> KT--EE | Shrew                              | EEG- <b>E</b> GAGED  | Coelacanth                         | EEK-DAESADE |
| Prairie                                             | EEE-----EE           | Star-nosed mole                    | EEG- <b>E</b> GQGE   | Tetraodon                          | -----       |
| Chinese hamster                                     | EGE-----EE           | Elephant                           | -----                | Fugu                               | -----       |
| Golden hamster                                      | EGE-----EG           | Cape elephant shrew                | GEG- <b>E</b> GEGEE  | Yellowbelly pufferfish             | -----       |
| Mouse                                               | EGE-----EE           | Manatee                            | GEE- <b>Q</b> EREEE  | Nile tilapia                       | SKR-DTESDLE |
| Rat                                                 | DEE-----ED           | Cape golden mole                   | -----                | Princess of Burundi                | SKR-DTESDLD |
| Naked mole-rat                                      | KEG-----             | Tenrec                             | EE--- <b>G</b> EGNDE | Burton's mouthbreeder              | SKR-DTESDLE |
| Guinea pig                                          | -----                | Aardvark                           | -----                | Zebra mbuna                        | SKR-DTESDLE |
| Chinchilla                                          | KEGEE <b>E</b> ---G  | Armadillo                          | EEE- <b>E</b> EREEE  | Pundamilia nyererei                | SKR-DTESDLE |
| Brush-tailed rat                                    | EEGEEEE--EE          | Opossum                            | RKK-- <b>E</b> RSRNG | Medaka                             | -----       |
| Rabbit                                              | -----                | Tasmanian devil                    | SKK-- <b>E</b> RSRNG | Southern platyfish                 | N-----RGRRE |
| Pika                                                | EEE-----EG           | Wallaby                            | -----                | Stickleback                        | SEE-EVDSGEE |
| Pig                                                 | DGE- <b>E</b> GEGEE  | Platypus                           | EEE- <b>G</b> EEEEE  | Atlantic cod                       | -----       |
| Alpaca                                              | ---EG <b>Q</b> EEEG  | Saker falcon                       | KKR- <b>E</b> KE-HEK | Zebrafish                          | R---EKESVAE |
| Bactrian camel                                      | EEE- <b>E</b> CEEEEG | Peregrine falcon                   | -----                | Mexican tetra (cavefish)           | EES-VKE-DHE |
| Dolphin                                             | EEE- <b>E</b> GGE    | Collared flycatcher                | -AG-E-NECEQ          | Spotted gar                        | SRT-EVE---- |
| Killer whale                                        | EEE- <b>E</b> GGE    | White-throated sparrow             | EMR- <b>E</b> GGEER  | Lamprey                            | DRG---GEDDA |
| Tibetan antelope                                    | -----                | Medium ground finch                | GMG-K <b>G</b> G--EG |                                    |             |
| Cow                                                 | -----                | Zebra finch                        | GMR- <b>E</b> TEEEQR |                                    |             |
| Sheep                                               | GGG- <b>E</b> GGE    | Tibetan ground jay                 | -----                |                                    |             |

**Table S3.** Clinical data from cone and cone-rod (CD and CRD) patients carrying variants on *RPGR*<sup>ORF15</sup>.

| ID       | Gender | Age of last visit | Decade of onset | Color Vision (Altered Axis)           | Comorbidities                             | BCVA OD | BCVA OS | ff-ERG                                  | SW-FAF                                                                                                                                                                 | SW-FAF pattern | OCT                                                                                                          | ERM | iHRF |
|----------|--------|-------------------|-----------------|---------------------------------------|-------------------------------------------|---------|---------|-----------------------------------------|------------------------------------------------------------------------------------------------------------------------------------------------------------------------|----------------|--------------------------------------------------------------------------------------------------------------|-----|------|
| CIC03862 | M      | 9                 | 1st decade      | Normal                                | None                                      | 0       | 0       | Normal Scotopic; photopic reduced       | Normal                                                                                                                                                                 | 1A             | Central dystrophic changes in the EZ                                                                         | no  | no   |
| CIC01418 | M      | 25                | 2nd decade      | Dyschromatopsia without definite axis | None                                      | 1.2     | 1.3     | Both reduced (photopic +)               | Patchy hypoautofluorescence along the temporal vascular arcades. Homogeneous hypoautofluorescence of the posterior pole surrounded by halo of hyperautofluorescence    | 3B             | Generalized thinning of the retina                                                                           | no  | no   |
| 782819   | M      | 37                |                 | Deutan OD / Protan OS                 | High Myopia                               | 0.7     | 0.7     | Scotopic reduced; photopic undetectable | Peripapillary atrophy; Grainy central hypoautofluorescence surrounded by hyperfluorescent ring                                                                         | 2B             | Posterior Staphyloma; Central RPE/outer retina atrophy; Preservation of all retinal layers around the lesion | no  | no   |
| CIC09352 | M      | 51                |                 | Not performed, vision too low         | Glaucoma                                  | 1.3     | 1.2     | Scotopic reduced; photopic undetectable | Central circular area of deep hypoautofluorescence, surrounded by halo of hyperautofluorescence                                                                        | 2A             | Central RPE/outer retina atrophy; Preservation of all retinal layers around the lesion                       | no  | no   |
| CIC04404 | M      | 36                | 2nd decade      | Not performed, vision too low         | High Myopia; Previous cataract surgery OO | 2       | 1.6     | Normal Scotopic; photopic reduced       | Peripapillary atrophy and focal areas of hypoautofluorescence nasally; central circular area of deep hypoautofluorescence, surrounded by halo of hyperautofluorescence | 2B             | Posterior Staphyloma; Central RPE/outer retina atrophy; Preservation of all retinal layers around the lesion | no  | no   |
| CIC02893 | M      | 53                | 4th decade      | Deutan                                | None                                      | 0.5     | 0.5     | Both reduced (photopic +)               | Peripapillary atrophy; Central area of                                                                                                                                 | 2B             | Central preservation of the outer retinal layers,                                                            | no  | no   |

|          |   |    |                |                                       |                              |     |     |                                         |                                                                                                                                   |    |                                                                                                                                                                                                  |    |     |
|----------|---|----|----------------|---------------------------------------|------------------------------|-----|-----|-----------------------------------------|-----------------------------------------------------------------------------------------------------------------------------------|----|--------------------------------------------------------------------------------------------------------------------------------------------------------------------------------------------------|----|-----|
|          |   |    | (color vision) |                                       |                              |     |     |                                         | isoautofluorescence surrounded by ring of granular hypoautofluorescence encircled by an hyperautofluorescent ring                 |    | surrounded by areas of dystrophic alterations of outer retinal layers with HRDs; preservation of the retinal layers in the periphery of the acquisition.                                         |    |     |
| CIC02863 | M | 35 | 2nd decade     | Dyschromatopsia without definite axis | None                         | 1   | 0.8 | Undetectable                            | Diffuse hypoautofluorescence                                                                                                      | 2B | Generalized RPE/Outer retina atrophy                                                                                                                                                             | no | yes |
| CIC07494 | M | 61 | 1st decade     | Not performed, vision too low         | Previous cataract surgery OO | 3   | 3   | Undetectable                            | Diffuse hypoautofluorescence                                                                                                      | 3B | Generalized RPE/Outer retina atrophy                                                                                                                                                             | no | yes |
| CIC06631 | M | 34 | 2nd decade     | Not performed, vision too low         | High Myopia                  |     |     | Scotopic reduced; photopic undetectable | Peripapillary atrophy; central circular area of deep hypoautofluorescence, surrounded by halo of hyperautofluorescence            | 2B | Central RPE/outer retina atrophy; Preservation of all retinal layers around the lesion                                                                                                           | no | no  |
| CIC03560 | M | 55 | 2nd decade     | Tritan                                | None                         | 0.4 | 0.2 | Normal Scotopic; photopic reduced       | Central area of isoautofluorescence surrounded by ring of granular hypoautofluorescence encircled by an hyperautofluorescent ring | 2A | Central area of isoautofluorescence surrounded by ring of granular hypoautofluorescence encircled by an hyperautofluorescent ring                                                                | no | no  |
| CIC06538 | M | 51 | 1st decade     | Deutan OD/ Deutan and Tritan OS       | High Myopia                  | 1.1 | 1.2 | Scotopic reduced; photopic undetectable | Central area of isoautofluorescence surrounded by ring of granular hypoautofluorescence encircled by an hyperautofluorescent ring | 2B | Central preservation of the outer retinal layers, surrounded by areas of dystrophic alterations of outer retinal layers; preservation of the retinal layers in the periphery of the acquisition. | no | yes |

|          |   |    |            |                                       |             |     |     |                                         |                                                                                                                                                                                                                                             |    |                                                                                                              |    |     |
|----------|---|----|------------|---------------------------------------|-------------|-----|-----|-----------------------------------------|---------------------------------------------------------------------------------------------------------------------------------------------------------------------------------------------------------------------------------------------|----|--------------------------------------------------------------------------------------------------------------|----|-----|
| CIC04447 | M | 38 | 2nd decade | Dyschromatopsia without definite axis | High Myopia | 1   | 1.1 | Scotopic reduced; photopic undetectable | Peripapillary atrophy; Lacquer cracks; grainy central hypoautofluorescence surrounded by hyperfluorescent ring                                                                                                                              | 3B | Posterior Staphyloma; Central RPE/outer retina atrophy; Preservation of all retinal layers around the lesion | no | no  |
| CIC04647 | M | 44 |            | Dyschromatopsia without definite axis | High Myopia | 0.7 | 0.6 | Scotopic reduced; photopic undetectable | Peripapillary atrophy; Grainy central hypoautofluorescence surrounded by hyperfluorescent ring                                                                                                                                              | 2B | Posterior Staphyloma; Central RPE/outer retina atrophy; Preservation of all retinal layers around the lesion | no | no  |
| CIC09451 | M | 48 |            | Dyschromatopsia without definite axis | High Myopia | 1.3 | 1.3 | Scotopic reduced; photopic undetectable | Peripapillary atrophy; Grainy central hypoautofluorescence surrounded by hyperfluorescent ring                                                                                                                                              | 1B | Central RPE/outer retina atrophy; Preservation of all retinal layers around the lesion                       | no | no  |
| CIC07574 | M | 39 | 2nd decade | Not performed, vision too low         | None        | 1   | 1   | Scotopic reduced; photopic undetectable | Central area of hypoautofluorescence with granular hypo/hyperautofluorescence extending towards the inferior, temporal and nasal directions                                                                                                 | 3B | Central outer retina atrophy                                                                                 | no | yes |
| CIC07658 | M | 46 |            | Tritan                                | High Myopia | 0.3 | 0.3 | Undetectable                            | Semicircular area of patchy hypoautofluorescence extending from around the optic disc towards the inferior temporal arcade and involving the central macula (with foveal sparing); This area is surrounded by an hyperautofluorescent halo. | 3B | Generalized retinal thinning with foveal sparing                                                             | no | yes |
| CIC07798 | M | 39 |            | Deutan and Protan                     | None        | 1   | 0.9 | Normal Scotopic; photopic reduced       | Central circular area of deep hypoautofluorescence,                                                                                                                                                                                         | 1B | Central RPE/outer retina atrophy; Preservation of                                                            | no | no  |



|          |   |    |  |                                       |                                        |     |     |                                         |                                                                                                                                                                                                                  |    |                                                                                                                                                                                        |    |     |
|----------|---|----|--|---------------------------------------|----------------------------------------|-----|-----|-----------------------------------------|------------------------------------------------------------------------------------------------------------------------------------------------------------------------------------------------------------------|----|----------------------------------------------------------------------------------------------------------------------------------------------------------------------------------------|----|-----|
|          |   |    |  |                                       |                                        |     |     |                                         | surrounded by halo of hyperautofluorescence                                                                                                                                                                      |    | all retinal layers around the lesion                                                                                                                                                   |    |     |
| CIC08152 | M | 35 |  | Not performed, vision too low         | None                                   | 1   | 1.2 | Normal Scotopic; photopic reduced       | Peripapillary atrophy; central circular area of deep hypoautofluorescence, surrounded by halo of hyperautofluorescence                                                                                           | 2B | Central RPE/outer retina atrophy; Preservation of all retinal layers around the lesion                                                                                                 | no | no  |
| CIC8901  | M | 73 |  | Not performed, vision too low         | None                                   | 1.2 | 1.1 | Scotopic reduced; photopic undetectable | Central circular area of deep hypoautofluorescence, surrounded by halo of hyperautofluorescence                                                                                                                  | 2B | Central RPE/outer retina atrophy; Preservation of all retinal layers around the lesion                                                                                                 | no | no  |
| CIC8918  | M | 47 |  | Deutan                                | None                                   | 1.3 | 1.3 | Normal Scotopic; photopic reduced       | Central area of hypoautofluorescence surrounded by halo of hyperautofluorescence                                                                                                                                 | 1A | Central EZ interruption                                                                                                                                                                | no | no  |
| CIC9067  | M | 48 |  |                                       | High Myopia                            | 0.2 | 0.4 | Normal Scotopic; photopic reduced       | Peripapillary atrophy; central area of hypoautofluorescence, surrounded by halo of hyperautofluorescence                                                                                                         | 2B | Dystrophic/atrophic changes of the EZ in the center                                                                                                                                    | no | yes |
| CIC8950  | M | 47 |  | Dyschromatopsia without definite axis | pseudophakic OU, retinal detachment OS | 0.9 | 1.2 | Normal Scotopic; photopic reduced       | RE: Peripapillary atrophy; central area of hypoautofluorescence, surrounded by halo of hyperautofluorescence. LE: Large area of chorioretinal atrophy extending from the macular towards the inferior periphery. | 2B | RE: Central RPE/outer retina atrophy; Preservation of all retinal layers around the lesion; HRDs. LE: Rearrangements of the retinal structure with loss of physiologic retinal profile | no | yes |
| CIC09151 | M | 48 |  |                                       |                                        | 0.4 | 0.5 | Scotopic reduced; photopic undetectable | Central area of isoautofluorescence surrounded by ring of granular hypoautofluorescence                                                                                                                          | 2A | Central preservation of the outer retinal layers, surrounded by areas of dystrophic alterations of outer retinal layers with HRDs; preservation of the                                 | no | no  |

|          |   |    |            |                                       |                       |     |     |                                        |                                                                                                                                   |    |                                                                                                                                                                                                            |     |     |
|----------|---|----|------------|---------------------------------------|-----------------------|-----|-----|----------------------------------------|-----------------------------------------------------------------------------------------------------------------------------------|----|------------------------------------------------------------------------------------------------------------------------------------------------------------------------------------------------------------|-----|-----|
|          |   |    |            |                                       |                       |     |     |                                        | encircled by an hyperautofluorescent ring                                                                                         |    | retinal layers in the periphery of the acquisition.                                                                                                                                                        |     |     |
| CIC01063 | M | 56 |            | Not performed, vision too low         | High myopia, glaucoma | LP  | LP  | Undetectable                           | Diffuse hypoautofluorescence                                                                                                      | 3B | Posterior staphyloma; diffuse atrophy of the outer retinal layers                                                                                                                                          | no  | no  |
| CIC10466 | M | 51 |            |                                       | None                  | 0.3 | 0.3 | Normal Scotopic; photopic reduced      | Central circular area of hypoautofluorescence, surrounded by halo of hyperautofluorescence                                        | 2A | Central RPE/outer retina atrophy; Preservation of all retinal layers around the lesion                                                                                                                     | no  | no  |
| CIC09949 | M | 55 | 2nd decade | Not performed, vision too low         |                       | 3   | 3   | Undetectable                           | peripapillary and inferotemporal patchy hypoautofluorescence; diffuse granular hypoautofluorescence                               | 3B | Central RPE/outer retina atrophy; Preservation of all retinal layers around the lesion                                                                                                                     | yes | yes |
| CIC10733 | M | 46 |            | Tritan                                | None                  | 0.3 | 0.5 | Normal Scotopic; photopic reduced      | Central area of isoautofluorescence surrounded by ring of granular hypoautofluorescence encircled by an hyperautofluorescent ring | 2A | Central preservation of the outer retinal layers, surrounded by areas of dystrophic alterations of outer retinal layers with HRDs; preservation of the retinal layers in the periphery of the acquisition. | no  | yes |
| CIC08066 | M | 28 | 1st decade | Dyschromatopsia without definite axis | High Myopia           | 0.2 | 0.2 | Normal Scotopic; photopic reduced      | Central area of hypoautofluorescence surrounded by halo of hyperautofluorescence                                                  | 1A | Central EZ interruption                                                                                                                                                                                    | no  | no  |
| CIC04835 | M | 40 | 3rd decade | Protan                                | High Myopia           | 0.4 | 0.7 | Normal Scotopic; photopic undetectable | Central area of isoautofluorescence surrounded by ring of granular hypoautofluorescence                                           | 2B | Central preservation of the outer retinal layers, surrounded by areas of dystrophic alterations of outer retinal layers; preservation of the retinal                                                       | no  | yes |

|          |   |    |            |                                                        |                                 |     |     |                                                |                                                                                                                                                                           |    |                                                                                                                                                                                                            |    |     |
|----------|---|----|------------|--------------------------------------------------------|---------------------------------|-----|-----|------------------------------------------------|---------------------------------------------------------------------------------------------------------------------------------------------------------------------------|----|------------------------------------------------------------------------------------------------------------------------------------------------------------------------------------------------------------|----|-----|
|          |   |    |            |                                                        |                                 |     |     |                                                | encircled by an hyperautofluorescent ring                                                                                                                                 |    | layers in the periphery of the acquisition.                                                                                                                                                                |    |     |
| CIC03515 | M | 47 | 3rd decade | Dyschromatopsia without definite axis                  |                                 | 0.2 | 0.3 | Normal Scotopic; photopic reduced              | Central area of hypoautofluorescence surrounded by halo of hyperautofluorescence                                                                                          | 1B | Central EZ interruption                                                                                                                                                                                    | no | yes |
| CIC09159 | M | 57 |            |                                                        | Previous cataract surgery in OO | 2   | 2   | Scotopic reduced; photopic undetectable        | Central area of isoautofluorescence surrounded by ring of granular hypoautofluorescence encircled by an hyperautofluorescent ring                                         | 2B | Central preservation of the outer retinal layers, surrounded by areas of dystrophic alterations of outer retinal layers with HRDs; preservation of the retinal layers in the periphery of the acquisition. | no | yes |
| CIC07400 | M | 38 | 3rd decade | Protan                                                 | None                            | 0.7 | 0.6 | Normal Scotopic; photopic reduced              | Central area of isoautofluorescence surrounded by ring of granular hypoautofluorescence encircled by an hyperautofluorescent ring                                         | 2A | Central preservation of the outer retinal layers, surrounded by areas of dystrophic alterations of outer retinal layers with HRDs; preservation of the retinal layers in the periphery of the acquisition. | no | yes |
| CIC09653 | M | 39 |            | Not performed, vision too low                          | High Myopia                     | 1.5 | 1.3 | Scotopic reduced; photopic undetectable        |                                                                                                                                                                           |    |                                                                                                                                                                                                            |    |     |
| CIC04850 | M | 39 | 3rd decade | Dyschromatopsia without definite axis (OD)/normal (OS) | None                            | 1.1 | 0.3 | Scotopic highly reduced; photopic undetectable | Semicircular area of patchy hypoautofluorescence extending from around the optic disc towards the inferior temporal arcade; Central circular area of hypoautofluorescence | 3B | Central RPE/outer retina atrophy; Preservation of all retinal layers around the lesion                                                                                                                     | no | yes |

|          |   |    |            |        |             |     |     |                                         |                                                                                                |    |                                                                                                              |     |     |
|----------|---|----|------------|--------|-------------|-----|-----|-----------------------------------------|------------------------------------------------------------------------------------------------|----|--------------------------------------------------------------------------------------------------------------|-----|-----|
|          |   |    |            |        |             |     |     |                                         | surrounded by halo of hyperautofluorescence.                                                   |    |                                                                                                              |     |     |
| CIC01503 | M | 41 |            | Protan | High Myopia | 0.9 | 0.7 | Normal Scotopic; photopic undetectable  | Peripapillary atrophy; Grainy central hypoautofluorescence surrounded by hyperfluorescent ring | 2B | Posterior Staphyloma; Central RPE/outer retina atrophy; Preservation of all retinal layers around the lesion | no  | yes |
| 1659193  | M | 47 | 2nd decade | Protan | None        | 1   | 1   | Scotopic reduced; photopic undetectable | Central area of hypoautofluorescence surrounded by halo of hyperautofluorescence               | 2A | Central RPE/outer retina atrophy; Preservation of all retinal layers around the lesion                       | yes | yes |

OCT: optical coherence tomography; SWAF: Short-wavelength fundus autofluorescence; ERM: epiretinal membrane; iHRF: intraretinal hyper-reflective foci; EZ: ellipsoid zone; RPE: retinal pigment epithelium, OD: Oculus Dexter for right eye, OS: Oculus Sinister for left eye, OU Oculus Uterque for both eyes; LP Light Perception.

**Table S4.** List of primers used for *RPGR*<sup>ORF15</sup> exon 15 Sanger sequencing.

| Type                   | ID primer    | Primer (FASTA)                   | Amplicon dimension (base pair) |
|------------------------|--------------|----------------------------------|--------------------------------|
| Primers for PCR        | ORF15_F3     | 5'-GACTAAACCCATAATATCCAAATCCA-3' | 1953                           |
|                        | ORF15_R6     | 3'-GCCAAAATTTACCAGTGCCTCCTAT-5'  |                                |
| Primers for Sequencing | ORF15_R7bSeq | 3'-CCTTCCTCCTCTCCCCCTCA-5'       | N/A                            |
|                        | ORF15_R8bSeq | 3'-TCCTTCCTCCTCTCCCCCTCCCA-5'    |                                |
|                        | ORF15_R9Seq  | 3'-CCCTGTGTGTTAGTAACTGAC-5'      |                                |
|                        | ORF15_R5Seq  | 3'-ACTGGCCATAATCGGGTCACAT-5'     |                                |
|                        | ORF15_R4Seq  | 3'-CTCTCCTCCTCCTTTTCAC-5'        |                                |
|                        | ORF15_R11Seq | 3'-CAATTTAATAACACGTAATGAGTG-5'   |                                |

**Table S5.** Best corrected visual acuity (BCVA) data from both eyes of the patients with *RPGR*-related cone and cone-rod dystrophies. All data are presented as mean  $\pm$  standard deviation. CI: confidence interval.

|                                                 | Number of observations | Right Eye            | Left Eye             | Mean absolute difference | (95% CI interval) |         | P value* |
|-------------------------------------------------|------------------------|----------------------|----------------------|--------------------------|-------------------|---------|----------|
|                                                 |                        |                      |                      |                          | Lower             | Upper   |          |
| BCVA at last visit, logMAR                      | 33                     | 1.12 $\pm$ 0.84      | 1.04 $\pm$ 0.77      | 0.17                     | -0.36             | 0.70    | 0.35     |
| Annual rate of BCVA decline, LogMAR/y           | 26                     | 0.04 $\pm$ 0.06      | 0.03 $\pm$ 0.06      | 0.073                    | -0.02             | 0.04    | 0.80     |
| Slope                                           |                        | 0.04 $\pm$ 0.08      | 0.03 $\pm$ 0.06      | 0.045                    | -0.09             | 0.18    | 0.53     |
| Intercept                                       |                        | -0.90 $\pm$ 3.34     | -0.54 $\pm$ 3.14     | 1.89                     | -3.82             | 7.59    | 0.46     |
| Annual rate of central hyperAF ring enlargement | 19                     |                      |                      |                          |                   |         |          |
| Horizontal diameter, $\mu\text{m}/\text{y}$     |                        | 42.88 $\pm$ 48.98    | 45.71 $\pm$ 47.13    | 3.46                     | -28.8             | 34.46   | 0.75     |
| Slope                                           |                        | 43.16 $\pm$ 47.81    | 44.04 $\pm$ 41.78    | 12.12                    | -28.66            | 30.42   | 0.52     |
| Intercept                                       |                        | 228.60 $\pm$ 1689.24 | 212.78 $\pm$ 1479.13 | 157.88                   | -1028.86          | 1060.5  | 0.09     |
| Vertical diameter, $\mu\text{m}/\text{y}$       |                        | 39.44 $\pm$ 40.90    | 38.12 $\pm$ 41.54    | 1.46                     | -25.80            | 28.44   | 0.67     |
| Slope                                           |                        | 39.36 $\pm$ 40.57    | 38.33 $\pm$ 39.46    | 16.78                    | -25.3             | 27.36   | 0.27     |
| Intercept                                       |                        | -24.16 $\pm$ 1658.86 | -21.10 $\pm$ 1432.58 | 29.78                    | -1016.74          | 1022.86 | 0.08     |
| CRT at last visit, $\mu\text{m}$                | 35                     | 148.97 $\pm$ 27.17   | 148 $\pm$ 26.17      | 3.8                      | -11.75            | 13.69   | 0.18     |

\*Wilcoxon signed-rank test; CRT: central retinal thickness
